# Supplementary material for: Large-scale Integrated Analysis of Genetics and Metabolomic Data Reveals Potential Links Between Lipids and Colorectal Cancer Risk
Source: Oxford University Press journal article supplement (doi:10.1158/1055-9965.epi-21-1008), 2022-03-10
Supplement: epi-21-1008_table_s4_suppst4.xlsx [file epi-21-1008_table_s4_suppst4.xlsx]

## Sheet: Supplementary Table 3
Supplementary Table 4. Genetic loci involved in the regulation of levels of selected metabolites
Metabolite	Loci
ADMA	10q24.2, PYROXD2
alanine	2p23.3, GCKR
Beta-aminoisobutyric acid	5p13.2, AGXT2; 12p13.33, SLC6A13
asparagine	4q34.3, AGA
C14_0_SM	14q23.2, SYNE2
C16_0_CE	11q12.2, FADS2; 18p11.21, GNAL
C16_0_LPE	15q21.3, LIPC
C18_2_LPE	11q12.2, FADS2
C20_3_CE	16p13.11, PDXDC1; NTAN1
C20_3_LPC	11q12.2, FADS2
C20_4_CE	7p11.2, SEC61G; 11q12.2, FADS2
C20_4_LPC	11q12.2, FADS2
C20_4_LPE	11q12.2, FADS2; 12p12.1, SLCO1B1
C20_5_CE	11q12.2, FADS2
C20_5_LPC	11q12.2, FADS2
C22_6_LPC	11q12.2, FADS2
C24_1_SM	5q12.1, PDE4D
C32_2_PC	2p23.3, GCKR
C34_2_DAG	11q23.3, ZPR1
C34_2_PC	11q12.2, FADS2
C34_3_PC	2p23.3, GCKR; 11q12.2, FADS2
C36_1_DAG	6q14.3, TBX18; 11q23.3, ZPR1
C36_2_DAG	11q23.3, ZPR1
C36_2_PC	11q12.2, FADS2
C36_4_PC_B	11q12.2, FADS2
C38_4_PC	11q12.2, FADS2
C38_5_PC	11q12.2, FADS2
C40_6_PC	11q12.2, FADS2
C48_2_TAG	2p23.3, GCKR
C48_3_TAG	2p23.3, GCKR
C50_3_TAG	2p23.3, GCKR
C50_4_TAG	2p23.3, GCKR
C52_3_TAG	11q23.3, ZPR1
C52_4_TAG	11q23.3, ZPR1
C52_5_TAG	11q23.3, ZPR1
C54_2_TAG	11q23.3, ZPR1
C54_3_TAG	11q23.3, ZPR1
C54_5_TAG	11q23.3, ZPR1
C56_10_TAG	11q23.3, ZPR1
C56_3_TAG	11q23.3, ZPR1
C56_7_TAG	7p12.1
C58_10_TAG	11q12.2, FADS2
C58_11_TAG	11q12.2, FADS2
C58_8_TAG	7p12.1
C58_9_TAG	7p12.1
carnitine	10q21.2, SLC16A9
Alpha hydroxybutyrate	2p23.3, GCKR
Lactate	2p23.3, GCKR
Orotate	3q21.2, UMPS
Xanthurenate	2q37.1, UGT1A
Creatine	2q34, CPS1
Dimethylglycine	5q14.1, DMGDH
GABA	7q36.1, AOC1
Glycine	2q34, CPS1
NMMA	1p22.3, DDAH1; 19q13.11, SLC7A9
Proline	22q11.21, DGCR5
Serine	1p12, PHGDH
Xanthosine	6p22.3, GMPR
